# Supplementary material for: Aminoglycosides in the Intensive Care Unit: What Is New in Population PK Modeling?
Source: Antibiotics (Basel). 2021 Apr 29;10(5):507. doi: 10.3390/antibiotics10050507 (PMC8145041; doi:10.3390/antibiotics10050507)
Supplement: Supplementary file 1 [file antibiotics-10-00507-s001.zip › antibiotics-1203031-supplementary.pdf]

Supplementary Information:

Table S1 : Checklist of information to be included when reporting a clinical pharmacokinetic study based on *ClinPK* [13]

| Drug       | Study                     | Title/Abstract |   | Background |   |   | Methods |   |   |   |    |    |    |    |    |    | Results |    |    |    |    |    | Discussion/Conclusion |    | Other Information |
|------------|---------------------------|----------------|---|------------|---|---|---------|---|---|---|----|----|----|----|----|----|---------|----|----|----|----|----|-----------------------|----|-------------------|
|            |                           | 1              | 2 | 3          | 4 | 5 | 6       | 7 | 8 | 9 | 10 | 11 | 12 | 13 | 14 | 15 | 16      | 17 | 18 | 19 | 20 | 21 | 22                    | 23 | 24                |
| Amikacin   | Boidin C [16]             | ●              | ● | ●          | ● | ● | ●       | ○ | ● | ○ | ●  | ●  | ●  | ●  | ●  | ●  | ○       | ○  | ●  | ●  | NA | NA | ●                     | ●  | ○                 |
|            | Roger C [17]              | ●              | ● | ●          | ● | ● | ●       | ○ | ● | ● | ●  | ●  | ●  | ○  | ●  | ●  | ○       | ○  | ●  | ●  | ●  | NA | ●                     | ●  | ●                 |
|            | Carrié C [18]             | ●              | ● | ●          | ● | ● | ●       | ○ | ● | ● | ●  | ●  | ●  | ●  | ●  | ●  | ○       | ○  | ●  | ●  | ●  | NA | ●                     | ●  | ●                 |
|            | Aréchiga-Alvarado NA [19] | ●              | ● | ●          | ● | ● | ●       | ○ | ● | ● | ●  | ●  | ●  | ●  | ●  | ●  | ○       | ○  | ●  | ●  | NA | NA | ●                     | ●  | ●                 |
|            | Petitcollin A [20]        | ●              | ● | ●          | ● | ● | ●       | ○ | ● | ● | ●  | ●  | ●  | ●  | ●  | ●  | ○       | ○  | ●  | ●  | NA | NA | ●                     | ●  | ●                 |
|            | French MA [21]            | ●              | ● | ●          | ● | ● | ●       | ● | ○ | ○ | ○  | ●  | ○  | ○  | ●  | ●  | ○       | ○  | ●  | ●  | NA | NA | ●                     | ●  | ●                 |
| Gentamicin | Hodiamont CJ [22]         | ●              | ● | ●          | ● | ● | ●       | ○ | ● | ● | ●  | ●  | ●  | ●  | ●  | ●  | ○       | ○  | ●  | ●  | ●  | NA | ●                     | ●  | ●                 |
|            | Teigen MM [23]            | ●              | ● | ●          | ● | ● | ●       | ○ | ● | ● | ●  | ●  | ●  | ●  | ●  | ●  | ○       | ○  | ●  | ●  | ●  | NA | ●                     | ●  | ●                 |
|            | Rea RS [24]               | ●              | ● | ●          | ● | ● | ●       | ○ | ● | ● | ●  | ●  | ●  | ●  | ●  | ●  | ○       | ○  | ●  | ●  | NA | NA | ●                     | ●  | ●                 |
|            | Bos JC [25]               | ●              | ● | ●          | ● | ● | ●       | ○ | ● | ● | ●  | ●  | ●  | ●  | ●  | ●  | ○       | ○  | ●  | ●  | NA | NA | ●                     | ●  | ●                 |
|            | Hodiamont CJ [26]         | ●              | ● | ●          | ● | ● | ●       | ○ | ● | ● | ●  | ●  | ●  | ●  | ●  | ●  | ○       | ○  | ●  | ●  | NA | NA | ●                     | ●  | ●                 |
|            | Roberts JA [27]           | ●              | ● | ●          | ● | ● | ●       | ○ | ● | ● | ●  | ●  | ●  | ●  | ●  | ●  | ○       | ○  | ●  | ●  | ●  | NA | ●                     | ●  | ●                 |
|            | Barletta JF [28]          | ●              | ● | ●          | ● | ● | ●       | ○ | ○ | ● | ○  | ●  | ●  | ●  | ●  | ●  | ○       | ○  | ●  | ●  | NA | NA | ○                     | ●  | ○                 |
|            | Gomes A [29]              | ●              | ● | ●          | ● | ● | ●       | ○ | ● | ● | ●  | ●  | ●  | ●  | ●  | ●  | ○       | ○  | ●  | ●  | NA | NA | ●                     | ●  | ●                 |
|            | Watling SM [30]           | ●              | ● | ●          | ● | ● | ●       | ○ | ● | ● | ●  | ●  | ●  | ●  | ●  | ●  | ○       | ○  | ●  | ●  | NA | NA | ●                     | ●  | ○                 |
|            | Kisor DF [31]             | ●              | ● | ●          | ● | ● | ●       | ○ | ○ | ● | ●  | ●  | ○  | ●  | ●  | ●  | ○       | ○  | ●  | ●  | NA | NA | ●                     | ●  | ○                 |
|            | French MA [21]            | ●              | ● | ●          | ● | ● | ●       | ● | ○ | ○ | ○  | ●  | ○  | ○  | ●  | ●  | ○       | ○  | ●  | ●  | NA | NA | ●                     | ●  | ●                 |
| Tobramycin | Conil JM [32]             | ●              | ● | ●          | ● | ● | ●       | ○ | ● | ● | ●  | ●  | ●  | ●  | ●  | ●  | ○       | ○  | ●  | ●  | NA | NA | ●                     | ●  | ●                 |
|            | Aarons L [33]             | ●              | ● | ●          | ● | ● | ●       | ○ | ○ | ● | ●  | ●  | ●  | ●  | ●  | ●  | ○       | ○  | ●  | ●  | NA | NA | ●                     | ●  | ●                 |
|            | Hennig S [34]             | ●              | ● | ●          | ● | ● | ●       | ○ | ● | ● | ●  | ●  | ●  | ●  | ●  | ●  | ○       | ○  | ●  | ●  | NA | NA | ●                     | ●  | ●                 |

● Information included  
○ Information not included or not found  
NA: Not Applicable

Table S2: Characteristics of the population pharmacokinetic models developed by the studies included in this review (one compartment)

| Drug       | Study                     | CL (L/h)                                                                                                                          |                                                                                 |        | V <sub>d</sub> (L)                                       |                |                                        | K <sub>el</sub>                                                        |                 |         | IIV                    |                         | RV          |                     |                      |
|------------|---------------------------|-----------------------------------------------------------------------------------------------------------------------------------|---------------------------------------------------------------------------------|--------|----------------------------------------------------------|----------------|----------------------------------------|------------------------------------------------------------------------|-----------------|---------|------------------------|-------------------------|-------------|---------------------|----------------------|
|            |                           | Formula                                                                                                                           | Parameter                                                                       | Value  | Formula                                                  | Parameter      | Value                                  | Formula                                                                | Parameter       | Value   | CL (%)                 | V <sub>d</sub> (%)      | Exponential | Proportional        | Additive             |
| Amikacin   | Aréchiga-Alvarado NA [19] | CL=θ <sub>1</sub> X (CL <sub>CR</sub> /130) <sup>03</sup>                                                                         | θ <sub>1</sub>                                                                  | 7.1    | V <sub>d</sub> = θ <sub>2</sub> X (IBW/68) <sup>04</sup> | θ <sub>2</sub> | 20.3                                   | NR                                                                     | NR              | NR      | 27.2                   | 33.6                    | —           | —                   | 1.78 mg/L            |
|            |                           |                                                                                                                                   | θ <sub>3</sub>                                                                  | 0.84   |                                                          | θ <sub>4</sub> | 2.94                                   |                                                                        |                 |         |                        |                         |             |                     |                      |
| Gentamicin | Teigen MM [23]            | CL <sub>NHD</sub> = θ <sub>1</sub> X (CL <sub>CR</sub> /0.53)                                                                     | θ <sub>1</sub>                                                                  | 0.453  | V <sub>d</sub> = θ <sub>3</sub>                          | θ <sub>3</sub> | 23.5                                   | NR                                                                     | NR              | NR      | ω <sup>2</sup> = 0.264 | ω <sup>2</sup> = 0.0256 | —           | 0.0804 <sup>a</sup> | 0.00659 <sup>a</sup> |
|            |                           | CL <sub>HHD</sub> = θ <sub>2</sub>                                                                                                | θ <sub>2</sub>                                                                  | 4.69   |                                                          |                |                                        |                                                                        |                 |         |                        |                         |             |                     |                      |
|            | Rea RS [24]               | CL= (θ <sub>1</sub> <sub>CLMAX</sub> X GFR <sup>1.2</sup> )/( θ <sub>2</sub> <sub>EGFRHILL50</sub> + GFR <sup>1.2</sup> )         | θ <sub>1</sub> <sub>CLMAX</sub>                                                 | 3.14   | V <sub>d</sub> = θ <sub>3</sub> X (BW/70)                | θ <sub>3</sub> | 53                                     | NR                                                                     | NR              | NR      | 83.7                   | 64.4                    | —           | 24.3                | 0.381 µg/mL          |
|            |                           |                                                                                                                                   | θ <sub>2</sub> <sub>EGFRHILL50</sub>                                            | 54.8   |                                                          |                |                                        |                                                                        |                 |         |                        |                         |             |                     |                      |
|            | Bos JC [25]               | CL=θ <sub>1</sub> X (1 + θ <sub>2</sub> <sub>Factor</sub> associating Gentamicin CL and CL <sub>Cr</sub> X (CL <sub>CR</sub> -74) | θ <sub>1</sub>                                                                  | 5.7    | NR                                                       | V <sub>d</sub> | 19                                     | NR                                                                     | NR              | NR      | 74                     | 49                      | —           | 32                  | 0.056 mg/L           |
|            |                           |                                                                                                                                   | θ <sub>2</sub> <sub>Factor</sub> associating Gentamicin CL and CL <sub>Cr</sub> | 0.0091 |                                                          |                |                                        |                                                                        |                 |         |                        |                         |             |                     |                      |
|            | Barletta JF [28]          | NR                                                                                                                                | CL                                                                              | 5.41   | NR                                                       | V <sub>d</sub> | Gentamicine:34.3<br>Tobramycine : 17.3 | NR                                                                     | NR              | NR      | 29.3                   | 11.9                    | —           | —                   | 144%                 |
|            | Gomes A [29]              | NR                                                                                                                                | CL <sub>fr</sub> <sup>b</sup>                                                   | 0.698  | NR                                                       | V <sub>d</sub> | 0.312 L/kg LBMc                        | NR                                                                     | NR              | NR      | NR                     | NR                      | NR          | NR                  | NR                   |
|            | Watling SM [30]           | NR                                                                                                                                | NR                                                                              | NR     | NR                                                       | V <sub>d</sub> | 0.34 L/Kg                              | K <sub>el</sub> = θ <sub>KS</sub> X CL <sub>CR</sub> + θ <sub>Ki</sub> | θ <sub>KS</sub> | 0.00218 | NR                     | NR                      | NR          | NR                  | NR                   |
|            |                           |                                                                                                                                   |                                                                                 |        |                                                          |                |                                        | NR                                                                     | θ <sub>Ki</sub> | 0.007   |                        |                         |             |                     |                      |
|            | Kisor DF [31]             | NR                                                                                                                                | CL                                                                              | 3.01   | NR                                                       | V <sub>d</sub> | 0.376 L/kg                             | NR                                                                     | K <sub>el</sub> | 0.203   | NR                     | NR                      | NR          | NR                  | NR                   |

BW Body Weight, CL Clearance, CL<sub>Cr</sub> Creatinine Clearance (mL/min/m2), CL<sub>HHD</sub> Hemodialysis Clearance, CL<sub>MAX</sub> Maximum Clearance, CL<sub>NHD</sub> Non hemodialysis Clearance, EGFRHILL50 GFR yielding half of CLMAX (mL/min), GFR Glomerular Filtration rate (mL/min) IBW Ideal Body Weight, IIV

Interindividual variation, K<sub>el</sub> Elimination Constant, K<sub>s</sub> K Slope, K<sub>i</sub> Intercept, LBMc Lean body mass according to the equation of Chennavasin corrected for fat distribution, NR Not Reported, RV Residual Variability, Vd Volume of Distribution

<sup>a</sup>Variance

<sup>b</sup>renal gentamicin clearance as a fraction of creatinine clearance

<sup>c</sup>PK Model was constructed with samples from Gentamicin and Tobramycin

Table S3: Characteristics of the population pharmacokinetic models developed by the studies included in this review (two-compartment)

| Drug           | Study              | CL (L/h)                                                                                                                                                           |                                                                                      |                      | V <sub>1</sub> (L)                                                                                          |                                   |                | V <sub>2</sub> (L)                                                                |                            |              | K <sub>el</sub> |                 |       |      |
|----------------|--------------------|--------------------------------------------------------------------------------------------------------------------------------------------------------------------|--------------------------------------------------------------------------------------|----------------------|-------------------------------------------------------------------------------------------------------------|-----------------------------------|----------------|-----------------------------------------------------------------------------------|----------------------------|--------------|-----------------|-----------------|-------|------|
|                |                    | Formula                                                                                                                                                            | Parameter                                                                            | Value                | Formula                                                                                                     | Parameter                         | Value          | Formula                                                                           | Parameter                  | Value        | Formula         | Parameter       | Value |      |
| Amikacin       | Boidin C [16]      | CL = θ <sub>1</sub> X (CL <sub>CG</sub> /73.6) <sup>0.02</sup>                                                                                                     | θ <sub>1</sub>                                                                       | 2.6                  | V <sub>1</sub> = θ <sub>3</sub> X (BSA/1.93)                                                                | θ <sub>3</sub>                    | 23             | V <sub>1</sub> = V <sub>2</sub>                                                   | V <sub>2</sub>             | 23           | NR              | NR              | NR    |      |
|                |                    |                                                                                                                                                                    | θ <sub>2</sub>                                                                       | 0.85                 |                                                                                                             |                                   |                |                                                                                   |                            |              |                 |                 |       |      |
|                | Roger C [17]       | CL = θ <sub>CLHF</sub> X [(TBW/80) <sup>0.75</sup> ] + θ <sub>CLHDF</sub> X [(TBW/75) <sup>0.75</sup> ]                                                            | θ <sub>CLHF</sub>                                                                    | 4.69                 | NR                                                                                                          | V <sub>1</sub> (central)          | 25.2           | NR                                                                                | NR                         | NR           | NR              | NR              | NR    |      |
|                |                    |                                                                                                                                                                    | θ <sub>CLHDF</sub>                                                                   | 4.45                 |                                                                                                             |                                   |                |                                                                                   |                            |              |                 |                 |       |      |
|                | Carrié C [18]      | CL= θ <sub>CLpop</sub> X (CL <sub>CR</sub> /66.7) <sup>0.69</sup>                                                                                                  | θ <sub>CLpop</sub>                                                                   | NR                   | V <sub>1</sub> = θ <sub>V1pop</sub> X (CL <sub>CR</sub> /66.7) <sup>0.22</sup> X (ABW/79.6) <sup>0.48</sup> | θ <sub>V1pop</sub>                | NR             | NR                                                                                | V <sub>n-crrt</sub>        | 11.7         | NR              | NR              | NR    |      |
|                |                    |                                                                                                                                                                    | CL <sub>n-crrt</sub>                                                                 | 3.02                 | NR                                                                                                          | V <sub>n-crrt</sub>               | 23.2           | NR                                                                                | V <sub>crrt</sub>          | 14.1         |                 |                 |       |      |
|                |                    |                                                                                                                                                                    | CL <sub>crrt</sub>                                                                   | 2.32                 | NR                                                                                                          | V <sub>crrt</sub>                 | 25.5           |                                                                                   |                            |              |                 |                 |       |      |
|                | Petitcollin A [20] | NR                                                                                                                                                                 | CL                                                                                   | 4.98                 | NR                                                                                                          | V <sub>c</sub>                    | 10.2           | NR                                                                                | V <sub>2</sub>             | 14.98        | NR              | K <sub>10</sub> | 0.488 |      |
| French MA [21] | NR                 | TBCL                                                                                                                                                               | 33.45 <sup>d</sup>                                                                   | NR                   | V <sub>c</sub>                                                                                              | 0.305 L/Kg                        | NR             | NR                                                                                | NR                         | NR           | K <sub>10</sub> | 0.1             |       |      |
| Gentamicin     | Hodiamont CJ [22]  | CL= θ <sub>noCVVH</sub> X (IBW/70) <sup>0.75</sup>                                                                                                                 | θ <sub>noCVVH</sub>                                                                  | 1.15                 | V <sub>1</sub> = θ <sub>1</sub> X (IBW/70) X (ALBM/22) <sup>-0.833</sup>                                    | θ <sub>1</sub>                    | 21.2 L/70 Kg   | NR                                                                                | V <sub>2</sub>             | 18.4 L/70 kg | NR              | NR              | NR    |      |
|                |                    |                                                                                                                                                                    | CL= θ <sub>CVVH</sub> X (IBW/70) <sup>0.75</sup>                                     | θ <sub>CVVH</sub>    |                                                                                                             |                                   |                |                                                                                   |                            |              |                 |                 |       | 2.13 |
|                | Hodiamont CJ [26]  | NR                                                                                                                                                                 | CL                                                                                   | 2.3                  | NR                                                                                                          | V <sub>1</sub>                    | 21.6           | NR                                                                                | V <sub>2</sub>             | 10.2         | NR              | NR              | NR    |      |
|                | Roberts JA [27]    | TVCL <sub>NEDD-f</sub> = θ <sub>1</sub> X (LBW/55) X FCR                                                                                                           | CL <sub>EDD-F</sub>                                                                  | 2.59                 | NR                                                                                                          | V <sub>c</sub>                    | 14.1           | NR                                                                                | V <sub>p</sub>             | 32.8         | NR              | NR              | NR    |      |
|                |                    |                                                                                                                                                                    | TVCL = TVCL <sub>NEDD-f</sub> + TVCL <sub>EDD-f</sub>                                | CL <sub>NEDD-F</sub> |                                                                                                             |                                   |                |                                                                                   |                            |              |                 |                 |       | 0.24 |
|                |                    |                                                                                                                                                                    |                                                                                      | TVCL                 |                                                                                                             |                                   |                |                                                                                   |                            |              |                 |                 |       | 2.83 |
|                | French MA [21]     | NR                                                                                                                                                                 | TBCL                                                                                 | 29.53 <sup>d</sup>   | NR                                                                                                          | V <sub>c</sub>                    | 0.257 L/Kg     | NR                                                                                | NR                         | NR           | NR              | K <sub>10</sub> | 0.18  |      |
|                | Tobramycin         | Conil JM [32]                                                                                                                                                      | TVCL = θ <sub>1</sub> + (θ <sub>2</sub> X (COCK-94)) + (θ <sub>3</sub> X (HEIG-172)) | θ <sub>1</sub>       | 3.83                                                                                                        | TVV <sub>1</sub> = θ <sub>4</sub> | θ <sub>4</sub> | 25.5                                                                              | NR                         | NR           | NR              | NR              | NR    | NR   |
| θ <sub>2</sub> |                    |                                                                                                                                                                    |                                                                                      | 0.02                 |                                                                                                             |                                   |                |                                                                                   |                            |              |                 |                 |       |      |
| θ <sub>3</sub> |                    |                                                                                                                                                                    |                                                                                      | 0.052                |                                                                                                             |                                   |                |                                                                                   |                            |              |                 |                 |       |      |
| Aarons L [33]  |                    | CL = θ <sub>1</sub> X CLCR                                                                                                                                         | θ <sub>1</sub>                                                                       | 0.059 <sup>e</sup>   | NR                                                                                                          | V <sub>1</sub>                    | 0.327          | NR                                                                                | NR                         | NR           | NR              | NR              | NR    |      |
| Hennig S [34]  |                    | CL <sub>f</sub> /m = θ <sub>CL<sub>f</sub>/m</sub> X (FFM/70) <sup>0.952</sup> X [1 + θ <sub>AGE</sub> X (AGE - 18)] X (SCR <sub>mean</sub> /SCR) <sup>0.222</sup> | θ <sub>CL<sub>f</sub></sub>                                                          | 8.1 L/h/70 Kg        | V <sub>1</sub> (f/m) = θ <sub>V<sub>1,f</sub>/m</sub> X (FFM/70)                                            | θ <sub>V<sub>1,f</sub></sub>      | 20.2 L/70 Kg   | V <sub>2</sub> = θ <sub>V<sub>2</sub></sub> X (FFM/70) <sup>θ<sub>FFM</sub></sup> | θ <sub>V<sub>2</sub></sub> | 10.0 L/70 Kg | NR              | NR              | NR    |      |
|                |                    |                                                                                                                                                                    | θ <sub>CL<sub>m</sub></sub>                                                          | 9.5 L/h/70 Kg        |                                                                                                             | θ <sub>V<sub>1,m</sub></sub>      | 25.2 L/70 Kg   |                                                                                   | θ <sub>FFM</sub>           | 0.975        |                 |                 |       |      |
|                |                    |                                                                                                                                                                    | θ <sub>Age<sub>u18</sub></sub>                                                       | -0.021               |                                                                                                             |                                   |                |                                                                                   |                            |              |                 |                 |       |      |
|                |                    |                                                                                                                                                                    | θ <sub>Age<sub>o18</sub></sub>                                                       | -0.01                |                                                                                                             |                                   |                |                                                                                   |                            |              |                 |                 |       |      |

*ABW* Adjusted Bodyweight, *ALBM* Albumine level, *Age\_o18* Age over 18 years old, *Age\_u18* Age under 18 years old, *BSA* Body Surface Area, *CLCG* or *CLCR* or *COCK* Creatinine clearance estimated by the original Cockcroft-Gault Equation, *CL<sub>CRRT</sub>* Clearance of patients under CRRT (Continuous renal replacement therapy), *CL<sub>CVVH</sub>* Clearance when patient is on CVVH (continuous venovenous haemofiltration), *CL<sub>EDD-f</sub>* Clearance when patient is on EDD-f (extended daily diafiltration) , *CLHDF* Clearance on hemodiafiltration, *CLHF* Clearance on hemofiltration, *CL<sub>NEDD-f</sub>* Clearance when patient is not on EDD-f, *CL<sub>noCVVH</sub>* Clearance when patient is off CVVH, *CL<sub>n-CRRT</sub>* Clearance of patients not under CRRT, *CL<sub>f</sub>* Clearance if patient is female, *CL<sub>m</sub>* Clearance if patient is male, *FCR* Inverse of the final plasma creatine concentration recorded in µmol/L before commencement of EDD-f, *FFM* Fat-free mass, *HEIG* Height, *IBW* Ideal Bodyweight, *Q* Intercompartment clearance, *TBCL* Total Body Clearance, *TBW* Total Bodyweight, *V1<sub>f</sub>* Apparent Volume of distribution of the central compartment if patient is female, *V1<sub>m</sub>* Apparent Volume of distribution of the central compartment if patient is male, *V1* or *Vc* central volume, *V<sub>CRRT</sub>* distribution volume of patients under CRRT, *V<sub>n-CRRT</sub>* distribution volume of patients not under CRRT, *Vp* peripheral volume

<sup>a</sup>Of note, the author set the peripheral volume V<sub>2</sub> equal to V<sub>1</sub>.  
<sup>b</sup> Coefficient of variation, calculated as the square root of (e<sup>ω<sup>2</sup></sup>-1)\*100%  
<sup>c</sup> Variance of the residual error  
<sup>d</sup> Estimated as ml/min  
<sup>e</sup> Proportionality constant relating creatinine clearance (ml/min) to drug clearance (L/h)

Table S3: Characteristics of the population pharmacokinetic models developed by the studies included in this review (two-compartment) (continued)

| Drug       | Study                              | Q (L/h)                                            |                     |       | K <sub>12</sub> (h <sup>-1</sup> ) |                      |       | K <sub>21</sub> (h <sup>-1</sup> ) |                      |       | IIV                                      |                                          |                                          |                                            | RV              |                    |                 |
|------------|------------------------------------|----------------------------------------------------|---------------------|-------|------------------------------------|----------------------|-------|------------------------------------|----------------------|-------|------------------------------------------|------------------------------------------|------------------------------------------|--------------------------------------------|-----------------|--------------------|-----------------|
|            |                                    | Formula                                            | Parameter           | Value | Formula                            | Parameter            | Value | Formula                            | Parameter            | Value | CL (%)                                   | V <sub>1</sub> (%)                       | V <sub>2</sub> (%)                       | Q (%)                                      | Exponential (%) | Proportional (%)   | Additive (mg/L) |
| Amikacin   | Boidin C <a href="#">[16]</a>      | NR                                                 | θ <sub>4</sub>      | 0.5   | NR                                 | NR                   | NR    | NR                                 | NR                   | NR    | NR                                       | NR                                       | NR                                       | NR                                         | NR              | NR                 | NR              |
|            | Roger C <a href="#">[17]</a>       |                                                    |                     |       | NR                                 | K <sub>12</sub> (cp) | 0.89  | NR                                 | K <sub>21</sub> (pc) | 2.38  | NR                                       | NR                                       | NR                                       | NR                                         | NR              | NR                 | NR              |
|            | Carrié C <a href="#">[18]</a>      | NR                                                 | Q <sub>n-crrt</sub> | 1.05  | NR                                 | NR                   | NR    | NR                                 | NR                   | NR    | ω <sup>2</sup> <sub>n-crrt</sub> = 0.345 | ω <sup>2</sup> <sub>n-crrt</sub> = 0.047 | ω <sup>2</sup> <sub>n-crrt</sub> = 0.695 | ω <sup>2</sup> <sub>n-crrt</sub> = 0.813   | –               | N-CRRT = 0.132     | –               |
|            |                                    |                                                    | Q <sub>crrt</sub>   | 1.19  |                                    |                      |       |                                    |                      |       | ω <sup>2</sup> <sub>crrt</sub> = 0.221   | ω <sup>2</sup> <sub>crrt</sub> = 0.081   | ω <sup>2</sup> <sub>crrt</sub> = 0.380   | ω <sup>2</sup> <sub>crrt</sub> = 0.418 L/h |                 | CRRT = 0.232       |                 |
|            | Petitcollin A <a href="#">[20]</a> | NR                                                 | Q                   | 12.85 | NR                                 | K <sub>12</sub>      | 1.26  | NR                                 | K <sub>21</sub>      | 0.858 | NR                                       | NR                                       | NR                                       | NR                                         | –               | 10.9               | 0.214           |
|            | French MA <a href="#">[21]</a>     |                                                    |                     |       | NR                                 | K <sub>12</sub>      | 0.016 | NR                                 | K <sub>21</sub>      | 0.005 | NR                                       | NR                                       | NR                                       | NR                                         | NR              | NR                 | NR              |
| Gentamicin | Hodiamont CJ <a href="#">[22]</a>  | NR                                                 | Q                   | 1.96* | NR                                 | NR                   | NR    | NR                                 | NR                   | NR    | CL <sub>noCVVH</sub> = 42.5 <sup>b</sup> | 17.2                                     | NR<br>NR                                 | NR<br>NR                                   | –               | 33.8               | –               |
|            | Hodiamont CJ <a href="#">[26]</a>  |                                                    |                     |       |                                    |                      |       |                                    |                      |       | CL <sub>CVVH</sub> = 29.5 <sup>b</sup>   |                                          |                                          |                                            |                 |                    |                 |
|            | Roberts JA <a href="#">[27]</a>    | NR                                                 | Q                   | 2.76  | NR                                 | NR                   | NR    | NR                                 | NR                   | NR    | 39.9 <sup>b</sup>                        | 16.4 <sup>b</sup>                        | 20.5 <sup>b</sup>                        | 110.5 <sup>b</sup>                         | –               | 20.8               | –               |
|            | French MA <a href="#">[21]</a>     | NR                                                 | NR                  | NR    | NR                                 | K <sub>12</sub>      | 0.025 | NR                                 | K <sub>21</sub>      | 0.01  | NR                                       | NR                                       | NR                                       | NR                                         | NR              | NR                 | NR              |
| Tobramycin | Conil JM <a href="#">[32]</a>      | NR                                                 | NR                  | NR    | NR                                 | NR                   | NR    | NR                                 | NR                   | NR    | ω <sup>2</sup> =0.095                    | ω <sup>2</sup> = 0.045                   | Fixed                                    | Fixed                                      | –               | 0.056 <sup>c</sup> | –               |
|            | Aarons L <a href="#">[33]</a>      | NR                                                 | NR                  | NR    | NR                                 | K <sub>12</sub>      | 0.012 | NR                                 | K <sub>21</sub>      | 0.027 | 32                                       | 3                                        | NR                                       |                                            | –               | 21                 | –               |
|            | Hennig S <a href="#">[34]</a>      | Q = θ <sub>Q</sub> X<br>(FFM/70) <sup>0.6FFM</sup> | θ <sub>Q</sub>      | 1.5*  | NR                                 | NR                   | NR    | NR                                 | NR                   | NR    | CL <sub>m</sub> = NR                     | V <sub>1,m</sub> = NR                    | 58.5                                     | 41.8                                       | –               | 20.4               | –               |
|            |                                    |                                                    | θ <sub>FFM</sub>    | 0.975 |                                    |                      |       |                                    |                      |       | CL <sub>f</sub> = 25.9                   | V <sub>1,f</sub> = 15.2                  |                                          |                                            |                 |                    |                 |

ABW Adjusted Bodyweight, ALBM Albumine level, Age<sub>o18</sub> Age over 18 years old, Age<sub>u18</sub> Age under 18 years old, BSA Body Surface Area, CL<sub>CG</sub> or CL<sub>CR</sub> or COCK Creatinine clearance estimated by the original Cockcroft-Gault Equation, CL<sub>CRRT</sub> Clearance of patients under CRRT (Continuous renal replacement therapy), CL<sub>CVVH</sub> Clearance when patient is on CVVH (continuous venovenous haemofiltration), CL<sub>EDD-f</sub> Clearance when patient is on EDD-f (extended daily diafiltration) , CL<sub>HDF</sub> Clearance on hemodiafiltration, CL<sub>HF</sub> Clearance on hemofiltration, CL<sub>NEDD-f</sub> Clearance when patient is not on EDD-f, CL<sub>noCVVH</sub> Clearance when patient is off CVVH, CL<sub>n-CRRT</sub> Clearance of patients not under CRRT, CL<sub>f</sub> Clearance if patient is female, CL<sub>m</sub> Clearance if patient is male, FCR Inverse of the final plasma creatine concentration recorded in μmol/L before commencement of EDD-f, FFM Fat-free mass, HEIG Height, IBW Ideal Bodyweight, Q Intercompartment clearance, TBCL Total Body Clearance, TBW Total Bodyweight, V1<sub>f</sub> Apparent Volume of distribution of the central compartment if patient is female, V1<sub>m</sub> Apparent Volume of distribution of the central compartment if patient is male, V<sub>1</sub> or V<sub>c</sub> central volume, V<sub>CRRT</sub> distribution volume of patients under CRRT, V<sub>n-CRRT</sub> distribution volume of patients not under CRRT, V<sub>p</sub> peripheral volume

<sup>a</sup>Of note, the author set the peripheral volume V<sub>2</sub> equal to V<sub>1</sub>.  
<sup>b</sup> Coefficient of variation, calculated as the square root of (e<sup>ω<sup>2</sup></sup>-1)\*100%  
<sup>c</sup> Variance of the residual error  
<sup>d</sup> Estimated as ml/min  
<sup>e</sup> Proportionality constant relating creatinine clearance (ml/min) to drug clearance (L/h)  
<sup>\*</sup> L/h/70 kg

Table S4. Covariates that were included or evaluated for inclusion by the population pharmacokinetic models included in this review.

| Drug                        | Study                       | Tested and significant covariates |     |        |      |                    |                    |                    |                |     |                     |                |      |     |     |     |     |            |      |                  |                  |                   |                       |                    |                      |                      |     |     |     |                     |                        |   |  |
|-----------------------------|-----------------------------|-----------------------------------|-----|--------|------|--------------------|--------------------|--------------------|----------------|-----|---------------------|----------------|------|-----|-----|-----|-----|------------|------|------------------|------------------|-------------------|-----------------------|--------------------|----------------------|----------------------|-----|-----|-----|---------------------|------------------------|---|--|
|                             |                             | Age                               | Sex | Height | Race | AdjBW <sup>a</sup> | AdjBW <sup>b</sup> | AdjBW <sup>c</sup> | TBW            | IBW | BW <sub>AD-40</sub> | LBW            | LBMc | FFM | BSA | BMI | SCr | hemoglobin | Salb | CL <sub>CG</sub> | CL <sub>Hf</sub> | CL <sub>Hdf</sub> | CL <sub>CKD-EPI</sub> | CL <sub>MDRD</sub> | CalcCL <sub>CR</sub> | CL <sub>Robert</sub> | ARC | FCR | GFR | GFR <sub>MDRD</sub> | GFR <sub>CKD-EPI</sub> |   |  |
| Amikacin                    | Boidin C [16]               | ○                                 | ○   | ○      |      |                    | ○                  | ○                  | ○              |     |                     |                |      |     | ●   | ○   | ○   |            |      | ●                |                  |                   |                       |                    |                      |                      |     |     |     |                     | ○                      | ○ |  |
|                             | Roger C [17]                | ○                                 |     |        |      |                    |                    |                    | ● <sup>d</sup> |     | ○                   |                |      |     |     |     |     |            | ○    |                  | ●                | ●                 |                       |                    |                      |                      |     |     |     |                     |                        |   |  |
|                             | Carrié C [18]               | ○                                 | ○   |        |      | ●                  |                    |                    | ○              |     |                     |                |      |     | ○   |     |     |            |      | ●                |                  |                   |                       |                    |                      |                      |     |     |     |                     |                        |   |  |
|                             | Aréchiga-Alvarado NA [19]   | ○                                 | ○   |        |      |                    | ○                  |                    | ○              | ●   |                     |                |      |     |     |     | ○   |            | ○    | ●                |                  |                   | ○                     |                    | ○                    |                      |     |     |     |                     |                        |   |  |
|                             | Petitcollin A [20]          | ○                                 | ○   |        |      |                    |                    |                    | ○              |     |                     |                |      |     |     |     |     |            |      | ●                |                  |                   |                       |                    |                      |                      |     |     |     |                     |                        |   |  |
|                             | French MA <sup>i</sup> [21] |                                   |     |        |      |                    |                    |                    |                |     |                     |                |      |     |     |     |     |            |      |                  |                  |                   |                       |                    |                      |                      |     |     |     |                     |                        |   |  |
| Gentamicin                  | Hodiamont CJ [22]           | ○                                 | ○   | ○      |      |                    |                    |                    |                | ●   |                     |                |      |     |     |     |     | ○          |      | ○                |                  |                   |                       |                    |                      | ○                    |     |     |     |                     |                        |   |  |
|                             | Teigen MM [23]              |                                   |     |        |      |                    |                    |                    | ○              | ○   |                     |                |      |     |     |     |     |            |      | ● <sup>f</sup>   |                  |                   |                       |                    |                      |                      |     |     |     |                     |                        |   |  |
|                             | Rea RS [24]                 | ○                                 | ○   |        | ○    |                    |                    |                    | ●              |     |                     |                |      |     |     |     |     | ○          |      |                  |                  |                   |                       |                    |                      |                      |     |     |     | ●                   |                        |   |  |
|                             | Bos JC [25]                 | ○                                 | ○   | ○      |      |                    |                    |                    | ○              |     |                     |                |      |     |     |     | ○   | ○          | ○    | ○                | ●                |                   |                       |                    |                      |                      | ○   |     |     |                     |                        |   |  |
|                             | Hodiamont CJ [26]           |                                   |     |        |      |                    |                    | ○                  | ○              | ○   |                     |                |      |     |     |     |     |            |      |                  |                  |                   |                       |                    |                      |                      |     |     |     |                     |                        |   |  |
|                             | Roberts JA [27]             | ○                                 |     |        |      |                    |                    |                    | ● <sup>g</sup> |     |                     | ● <sup>h</sup> |      |     |     |     |     |            |      |                  | ○                |                   |                       |                    |                      |                      |     |     | ●   |                     |                        |   |  |
|                             | Barletta JF [28]            | ○                                 |     |        |      |                    |                    |                    |                |     |                     |                |      |     |     |     |     |            |      |                  | ○                |                   |                       |                    |                      |                      |     |     |     |                     |                        |   |  |
|                             | Gomes A [29]                | ○                                 | ○   | ○      |      |                    |                    |                    | ●              |     |                     | ○              | ●    | ○   | ○   |     |     |            |      |                  | ○                |                   |                       |                    |                      |                      |     |     |     |                     |                        |   |  |
|                             | Watling SM [30]             |                                   |     |        |      |                    |                    |                    |                |     |                     |                |      |     |     |     |     |            |      |                  |                  |                   |                       |                    |                      |                      |     |     |     |                     |                        |   |  |
|                             | Kisor DF <sup>i</sup> [31]  |                                   |     |        |      |                    |                    |                    |                |     |                     |                |      |     |     |     |     |            |      |                  |                  |                   |                       |                    |                      |                      |     |     |     |                     |                        |   |  |
| French MA <sup>i</sup> [21] |                             |                                   |     |        |      |                    |                    |                    |                |     |                     |                |      |     |     |     |     |            |      |                  |                  |                   |                       |                    |                      |                      |     |     |     |                     |                        |   |  |
| Tobramycin                  | Conil JM [32]               |                                   |     | ●      |      |                    |                    |                    |                | ○   |                     |                |      |     |     |     |     | ○          |      |                  |                  |                   |                       |                    |                      |                      | ○   |     |     |                     |                        |   |  |
|                             | Aarons L [33]               |                                   |     |        |      |                    |                    |                    | ○              |     |                     |                |      |     |     |     |     |            |      | ●                |                  |                   |                       |                    |                      |                      |     |     |     |                     |                        |   |  |
|                             | Hennig S [34]               | ●                                 | ○   | ○      |      |                    |                    |                    | ○              |     |                     |                |      | ●   |     |     | ●   |            |      | ○                |                  |                   |                       |                    |                      |                      |     |     |     |                     |                        |   |  |

ADJ Adjusted body weight, ALAT Alanine amino transferase, APACHE II Acute Physiology and chronic health evaluation II, ARC Augmented renal clearance (ARC) defined as a CLCR ≥ 130 mL/min, ASAT Aspartate amino transferase, BMI Body Mass Index, BSA Body Surface Area, BUN Blood Urea Nitrogen, BW<sub>AD-40</sub> Difference in patient's weight between the time of admission and the sampling day, CalcCLCR Creatinine clearance calculated from the creatinine concentration in a 6-h urine portion,CBW Corrected body weight, CF Cystic Fibrosis, CLCKD-EPI Creatinine clearance estimated with CKD-EPI, CLCG Creatinine Clearance estimated by Cockcroft-Gault equation, CL<sub>Hdf</sub>total amikacin clearance on hemodiafiltration, CL<sub>Hf</sub> total amikacin clearance on hemofiltration, CL<sub>MDRD</sub>Creatinine clearance calculated with MDRD, CL<sub>Robert</sub> Creatinine Clearance estimated by Robert equation, CVVH Continuous venovenous haemofiltration, EDD-f Extended daily diafiltration, FCR Inverse of the final plasma creatine concentration recorded in µmol/L before commencement of EDD-f, FFM Fat free mass, Fluid<sub>NPT</sub> Amount of fluids collected by the NPT over the sampling day, GFR Glomerual filtration rate, GFR<sub>MDRD</sub> GFR estimated by the equation fro the Modification of Diet in Renal Disease, GFR<sub>CKD-EPI</sub> GFR estimated by the equation from the Chronic Kidney Disease, IBW Ideal body weight, ICU Intensive Care Unit, LBW Lean body weight, LBMc Lean body mass according to the equation of Chennavasin (source), NPT Negative Pressure Therapy, NSAIDs Nonsteroidal anti-inflammatory drugs, SAlb Serum albumin, SAPSII Simplified acute physiology score II,SCR Serum Creatinine, SOFA Sepsis-related organ failure assessment score

● Tested and significant

○ Tested and not significant

<sup>a</sup> Adjusted body weight (ABW) was determined as follows : i) for BMI ≤ 30 kg/m², ABW = TBW; ii) for BMI > 30 kg/m², ABW= ideal body weight (IBW) + 0.43 (TBW - IBW), with IBW calculated according to the Lorenz formula [74]

<sup>b</sup> Adjusted body weight was calculated as proposed by Bauer et al.: AdjBW = 0.4(TBW-IBW) +IBW for morbidly obese patients (IBW/TBW ratio of ≥ 1.9)

<sup>c</sup> Adjusted body weight proposed by Traynor et al. Was adapted according to French recommendations with a weight correction factor for overweight patients (IBW/TBW ratio of ≥ 1.25) and calculated as CBW = 0.43 (TBW-IBW)+IBW

<sup>d</sup> Described as Actual body weight

<sup>e</sup> Modified SOFA score (without neurologic and renal components)

<sup>f</sup> Creatinine Clearance estimated with Cockcroft-Gault with ideal body weight

<sup>g</sup> Normalized to 70 kg

<sup>h</sup> Normalized to 55 kg

<sup>i</sup> Covariate models were not used in this study

**Table S4.** Covariates that were included or evaluated for inclusion by the population pharmacokinetic models included in this review (continued).

|            |                             | Tested and significant covariates |              |                 |      |      |      |     |                |                 |                      |                                                                                     |                     |                                    |                                            |                                        |                         |            |                     |              |
|------------|-----------------------------|-----------------------------------|--------------|-----------------|------|------|------|-----|----------------|-----------------|----------------------|-------------------------------------------------------------------------------------|---------------------|------------------------------------|--------------------------------------------|----------------------------------------|-------------------------|------------|---------------------|--------------|
| Drug       | Study                       | SOFA score                        | SAPSII score | APACHE II score | ALAT | ASAT | Urea | BUN | Total proteins | Total bilirubin | Total daily diuresis | Serum electrolytes (sodium, potassium, chloride, calcium, phosphorus and magnesium) | 24 hr fluid balance | Fluid balance since ICU admittance | Administration of total parental nutrition | Flow rate of ultrafiltrate during CVVH | Residual Renal function | Filter age | Fluids <sup>a</sup> | Hemodialysis |
| Amikacin   | Boidin C [16]               | ○                                 | ○            |                 | ○    | ○    |      |     |                |                 |                      |                                                                                     |                     |                                    |                                            |                                        |                         |            |                     |              |
|            | Roger C [17]                |                                   |              |                 |      |      |      |     |                |                 |                      |                                                                                     |                     |                                    |                                            |                                        | ○                       |            | ○                   |              |
|            | Carrié C [18]               | ○*                                |              |                 |      |      |      |     |                |                 |                      |                                                                                     | ○                   |                                    |                                            |                                        |                         |            |                     | ○            |
|            | Aréchiga-Alvarado NA [19]   |                                   |              | ○               |      |      | ○    | ○   | ○              | ○               |                      | ○                                                                                   |                     |                                    |                                            |                                        |                         |            |                     |              |
|            | Petitcollin A [20]          |                                   |              |                 |      |      |      |     |                |                 |                      |                                                                                     |                     |                                    |                                            |                                        |                         |            |                     |              |
|            | French MA <sup>i</sup> [21] |                                   |              |                 |      |      |      |     |                |                 |                      |                                                                                     |                     |                                    |                                            |                                        |                         |            |                     |              |
| Gentamicin | Hodiamont CJ [22]           |                                   |              | ○               |      |      |      |     |                |                 | ○                    |                                                                                     | ○                   | ○                                  | ○                                          |                                        | ○                       |            |                     |              |
|            | Teigen MM [23]              |                                   |              |                 |      |      |      |     |                |                 |                      |                                                                                     |                     |                                    |                                            |                                        |                         |            |                     | ●            |
|            | Rea RS [24]                 |                                   |              |                 |      |      |      |     |                |                 |                      |                                                                                     |                     |                                    |                                            |                                        |                         |            |                     |              |
|            | Bos JC [25]                 |                                   |              |                 |      |      |      |     |                |                 |                      |                                                                                     |                     |                                    |                                            |                                        |                         |            |                     |              |
|            | Hodiamont CJ [26]           |                                   |              |                 |      |      |      |     |                |                 |                      |                                                                                     |                     |                                    |                                            |                                        |                         |            |                     |              |
|            | Roberts JA [27]             |                                   |              |                 |      |      |      |     |                |                 |                      |                                                                                     |                     |                                    |                                            |                                        |                         |            |                     |              |
|            | Barletta JF [28]            |                                   |              |                 |      |      |      |     |                |                 |                      |                                                                                     |                     |                                    |                                            |                                        |                         |            |                     |              |
|            | Gomes A [29]                |                                   |              |                 |      |      |      |     |                |                 |                      |                                                                                     |                     |                                    |                                            |                                        |                         |            |                     |              |
|            | Watling SM [30]             |                                   |              |                 |      |      |      |     |                |                 |                      |                                                                                     |                     |                                    |                                            |                                        |                         |            |                     |              |
|            | Kisor DF <sup>i</sup> [31]  |                                   |              |                 |      |      |      |     |                |                 |                      |                                                                                     |                     |                                    |                                            |                                        |                         |            |                     |              |
| Tobramycin | French MA <sup>i</sup> [21] |                                   |              |                 |      |      |      |     |                |                 |                      |                                                                                     |                     |                                    |                                            |                                        |                         |            |                     |              |
|            | Conil JM [32]               |                                   |              |                 |      |      |      | ○   |                |                 |                      |                                                                                     |                     |                                    |                                            |                                        |                         |            |                     |              |
|            | Aarons L [33]               |                                   |              |                 |      |      |      |     |                |                 |                      |                                                                                     |                     |                                    |                                            |                                        |                         |            |                     |              |
|            | Hennig S [34]               |                                   |              |                 |      |      |      |     |                |                 |                      |                                                                                     |                     |                                    |                                            |                                        |                         |            |                     |              |

*ADJ* Adjusted body weight, *ALAT* Alanine amino transferase, *APACHE II* Acute Physiology and chronic health evaluation II, *ARC* Augmented renal clearance (ARC) defined as a  $CLCR \geq 130$  mL/min, *ASAT* Aspartate amino transferase, *BMI* Body Mass Index, *BSA* Body Surface Area, *BUN* Blood Urea Nitrogen,  $BW_{AD-H}$  Difference in patient's weight between the time of admission and the sampling day, *CalcCLCR* Creatinine clearance calculated from the creatinine concentration in a 6-h urine portion, *CBW* Corrected body weight, *CF* Cystic Fibrosis, *CLCKD-EPI* Creatinine clearance estimated with CKD-EPI, *CLCG* Creatinine Clearance estimated by Cockcroft-Gault equation,  $CL_{hd}$  total amikacin clearance on hemodiafiltration,  $CL_{hf}$  total amikacin clearance on hemofiltration,  $CL_{MDRD}$  Creatinine clearance calculated with MDRD,  $CL_{Robert}$  Creatinine Clearance estimated by Robert equation, *CVVH* Continuous venovenous haemofiltration,  $EDD-f$  Extended daily diafiltration, *FCR* Inverse of the final plasma creatine concentration recorded in µmol/L before commencement of EDD-f, *FFM* Fat free mass,  $Fluid_{NPT}$  Amount of fluids collected by the NPT over the sampling day, *GFR* Glomerular filtration rate,  $GFR_{MDRD}$  GFR estimated by the equation from the Modification of Diet in Renal Disease,  $GFR_{CKD-EPI}$  GFR estimated by the equation from the Chronic Kidney Disease, *IBW* Ideal body weight, *ICU* Intensive Care Unit, *LBW* Lean body weight, *LBMc* Lean body mass according to the equation of Chennavasin (source), *NPT* Negative Pressure Therapy, *NSAIDs* Nonsteroidal anti-inflammatory drugs, *SAlb* Serum albumin, *SAPSII* Simplified acute physiology score II, *SCR* Serum Creatinine, *SOFA* Sepsis-related organ failure assessment score

• Tested and significant

◦ Tested and not significant

<sup>a</sup> Adjusted body weight (ABW) was determined as follows : i) for  $BMI \leq 30$  kg/m<sup>2</sup>,  $ABW = TBW$ ; ii) for  $BMI > 30$  kg/m<sup>2</sup>,  $ABW = \text{ideal body weight (IBW)} + 0.43 (TBW - IBW)$ , with IBW calculated according to the Lorenz formula [74]

<sup>b</sup> Adjusted body weight was calculated as proposed by Bauer et al.:  $AdjBW = 0.4(TBW-IBW) + IBW$  for morbidly obese patients (IBW/TBW ratio of  $\geq 1.9$ )

<sup>c</sup> Adjusted body weight proposed by Traynor et al. Was adapted according to French recommendations with a weight correction factor for overweight patients (IBW/TBW ratio of  $\geq 1.25$ ) and calculated as  $CBW = 0.43 (TBW-IBW)+IBW$

<sup>d</sup> Described as Actual body weight

<sup>e</sup> Modified SOFA score (without neurologic and renal components)

<sup>f</sup> Creatinine Clearance estimated with Cockcroft-Gault with ideal body weight

<sup>g</sup> Normalized to 70 kg

<sup>h</sup> Normalized to 55 kg

<sup>i</sup> Covariate models were not used in this study

Table S4. Covariates that were included or evaluated for inclusion by the population pharmacokinetic models included in this review (continued).

|            |                             | Tested and significant covariates |            |                      |               |                                 |                                |                                                             |                    |             |                    | Usage of concomitant medication |                   |                |           |              |                   |                 |  |
|------------|-----------------------------|-----------------------------------|------------|----------------------|---------------|---------------------------------|--------------------------------|-------------------------------------------------------------|--------------------|-------------|--------------------|---------------------------------|-------------------|----------------|-----------|--------------|-------------------|-----------------|--|
| Drug       | Study                       | Childhood (<18 years)             | Study Site | Reason for admission | Usage of CVVH | Usage of mechanical ventilation | Disease presence (CF or no-CF) | Diagnosis of diabetes mellitus and/or arterial hypertension | Gas humidification | Vasopressin | Aminosteroids used | NSAIDs                          | Opioid analgesics | Cephalosporins | Diuretics | Antimycotics | Inotropics agents | Corticosteroids |  |
| Amikacin   | Boidin C [16]               |                                   |            |                      |               |                                 |                                |                                                             |                    |             |                    |                                 |                   |                |           |              |                   |                 |  |
|            | Roger C [17]                |                                   |            |                      |               |                                 |                                |                                                             |                    | ◦           |                    |                                 |                   |                |           |              |                   |                 |  |
|            | Carrié C [18]               |                                   |            |                      |               |                                 |                                |                                                             |                    | ◦           |                    |                                 |                   |                |           |              |                   |                 |  |
|            | Aréchiga-Alvarado NA [19]   |                                   |            |                      |               | ◦                               |                                | ◦                                                           | ◦                  |             |                    | ◦                               | ◦                 | ◦              | ◦         | ◦            | ◦                 | ◦               |  |
|            | Petitcollin A [20]          |                                   |            |                      |               |                                 |                                |                                                             |                    |             |                    |                                 |                   |                |           |              |                   |                 |  |
|            | French MA <sup>i</sup> [21] |                                   |            |                      |               |                                 |                                |                                                             |                    |             |                    |                                 |                   |                |           |              |                   |                 |  |
| Gentamicin | Hodiamont CJ [22]           |                                   |            |                      |               | •                               |                                |                                                             |                    |             |                    |                                 |                   |                |           |              |                   |                 |  |
|            | Teigen MM [23]              |                                   |            |                      |               |                                 |                                |                                                             |                    |             |                    |                                 |                   |                |           |              |                   |                 |  |
|            | Rea RS [24]                 |                                   |            |                      |               |                                 |                                |                                                             |                    |             |                    |                                 |                   |                |           |              |                   |                 |  |
|            | Bos JC [25]                 |                                   |            |                      |               |                                 |                                |                                                             |                    |             |                    |                                 |                   |                |           |              |                   |                 |  |
|            | Hodiamont CJ [26]           |                                   |            |                      |               |                                 |                                |                                                             |                    |             |                    |                                 |                   |                |           |              |                   |                 |  |
|            | Roberts JA [27]             |                                   |            |                      |               |                                 |                                |                                                             |                    |             |                    | •                               |                   |                |           |              |                   |                 |  |
|            | Barletta JF [28]            |                                   |            |                      |               |                                 |                                |                                                             |                    |             |                    |                                 |                   |                |           |              |                   |                 |  |
|            | Gomes A [29]                |                                   |            |                      |               |                                 |                                |                                                             |                    |             |                    |                                 |                   |                |           |              |                   |                 |  |
|            | Watling SM [30]             |                                   |            |                      |               |                                 |                                |                                                             |                    |             |                    |                                 |                   |                |           |              |                   |                 |  |
|            | Kisor DF <sup>i</sup> [31]  |                                   |            |                      |               |                                 |                                |                                                             |                    |             |                    |                                 |                   |                |           |              |                   |                 |  |
| Tobramycin | French MA <sup>i</sup> [21] |                                   |            |                      |               |                                 |                                |                                                             |                    |             |                    |                                 |                   |                |           |              |                   |                 |  |
|            | Conil JM [32]               | ◦                                 | ◦          | ◦                    |               |                                 |                                |                                                             |                    |             |                    |                                 |                   |                |           |              |                   |                 |  |
|            | Aarons L [33]               |                                   |            |                      |               |                                 |                                |                                                             |                    |             |                    |                                 |                   |                |           |              |                   |                 |  |
|            | Hennig S [34]               |                                   |            |                      |               |                                 | ◦                              |                                                             |                    |             |                    |                                 |                   |                |           |              |                   |                 |  |

*ADJ* Adjusted body weight, *ALAT* Alanine amino transferase, *APACHE II* Acute Physiology and chronic health evaluation II, *ARC* Augmented renal clearance (ARC) defined as a CLCR ≥ 130 mL/min, *ASAT* Aspartate amino transferase, *BMI* Body Mass Index, *BSA* Body Surface Area, *BUN* Blood Urea Nitrogen, *BW<sub>AD-10</sub>* Difference in patient's weight between the time of admission and the sampling day, *CalcCLCR* Creatinine clearance calculated from the creatinine concentration in a 6-h urine portion,*CBW* Corrected body weight, *CF* Cystic Fibrosis, *CLCKD-EPI* Creatinine clearance estimated with CKD-EPI, *CLCG* Creatinine Clearance estimated by Cockcroft-Gault equation, *CL<sub>hd</sub>* total amikacin clearance on hemodiafiltration, *CL<sub>hf</sub>* total amikacin clearance on hemofiltration, *CL<sub>MDRD</sub>* Creatinine clearance calculated with MDRD, *CL<sub>Robert</sub>* Creatinine Clearance estimated by Robert equation, *CVVH* Continuous venovenous haemofiltration, *EDD-f* Extended daily diafiltration, *FCR* Inverse of the final plasma creatine concentration recorded in µmol/L before commencement of EDD-f, *FFM* Fat free mass, *Fluid<sub>NPT</sub>* Amount of fluids collected by the NPT over the sampling day, *GFR* Glomerual filtration rate, *GFR<sub>MDRD</sub>* GFR estimated by the equation fro the Modification of Diet in Renal Disease, *GFR<sub>CKD-EPI</sub>* GFR estimated by the equation from the Chronic Kidney Disease, *IBW* Ideal body weight, *ICU* Intensive Care Unit, *LBW* Lean body weight, *LBM<sub>c</sub>* Lean body mass according to the equation of Chennavasin (source), *NPT* Negative Pressure Therapy, *NSAIDs* Nonsteroidal anti-inflammatory drugs, *SAlb* Serum albumin, *SAPSII* Simplified acute physiology score II,*SCR* Serum Creatinine, *SOFA* Sepsis-related organ failure assessment score

• Tested and significant

◦ Tested and not significant

<sup>a</sup> Adjusted body weight (ABW) was determined as follows : i) for BMI ≤ 30 kg/m², ABW = TBW; ii) for BMI > 30 kg/m², ABW= ideal body weight (IBW) + 0.43 (TBW - IBW), with IBW calculated according to the Lorenz formula [\[74\]](#)

<sup>b</sup> Adjusted body weight was calculated as proposed by Bauer et al.: AdjBW = 0.4(TBW-IBW) +IBW for morbidly obese patients (IBW/TBW ratio of ≥ 1.9)

<sup>c</sup> Adjusted body weight proposed by Traynor et al. Was adapted according to French recommendations with a weight correction factor for overweight patients (IBW/TBW ratio of ≥ 1.25) and calculated as CBW = 0.43 (TBW-IBW)+IBW

<sup>d</sup> Described as Actual body weight

<sup>e</sup> Modified SOFA score (without neurologic and renal components)

<sup>f</sup> Creatinine Clearance estimated with Cockcroft-Gault with ideal body weight

<sup>g</sup> Normalized to 70 kg

<sup>h</sup> Normalized to 55 kg

<sup>i</sup> Covariate models were not used in this study

## Model validation

Before assessing that a Pop-PK model is accurate for a specific population of patients, several steps should be completed beforehand to evaluate the model.

Firstly, pharmacokinetic parameters from the model to be evaluated are to be used to predict the concentration at the same sampling times of the new dataset. Based on these predictions, in order to assess predictive performance, goodness-of-fit plots of the predicted concentration and observed concentration should be done. Secondly, as part of assessing predictive performance, different metrics should also be estimated based on prediction error (PE) [71]. The latter can be calculated from the following equation:

$$PE = \frac{C_{pred_i} - C_{obs_i}}{C_{obs_i}} \times 100\% \quad (1)$$

where  $C_{pred}$  and  $C_{obs}$  are the  $i$ th predicted and observed concentrations, respectively. In order to quantify bias, commonly used metrics are median or mean PE (MDPE<sub>i</sub>) value based on the following equation:

$$MDPE_i (\%) = \text{median or mean } (PE_{ij}, j = 1, \dots, N_i) \quad (2)$$

From the values obtained for MADPE and MDPE, 95% confidence intervals should also be obtained to have a better overview of their plausible ranges. The 95% confidence intervals for MDPE should contain zero to be considered unbiased, whereas MADPE should be <20% to be deemed precise. The evaluation of these metrics also aims to determine if the Pop-PK model tends to under- or over-predict aminoglycosides concentrations. Considering that the consequences from an under-estimation of aminoglycosides concentrations (i.e. negative value of MDPE) could lead to nephrotoxicity and ototoxicity, the need of carefully evaluating a Pop-PK model before its application and generalization in other populations is even more crucial. On the other hand, an over-estimation of concentration could lead to a failure of reaching therapeutic targets of  $C_{max}/MIC$  for aminoglycosides.

Secondly, advanced internal validation, also known as interpolation, relies on simulations or subsets of the original dataset used for model building. Bootstraps, visual predictive checks (VPCs) or normalized prediction distribution error (NPDE) analysis are a few common strategies that should be considered to establish the overall fit of the Pop-PK model.
